# Supplementary material for: Alteration in gut microbiota associated with hepatitis B and non-hepatitis virus related hepatocellular carcinoma
Source: PubMed Central journal article supplement (PMC6337822; doi:10.1186/s13099-018-0281-6), 2019-01-18

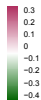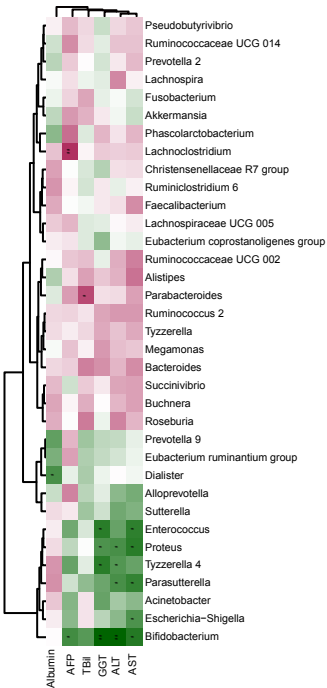

Supplement: 13099_2018_281_MOESM7_ESM.pdf [file 13099_2018_281_MOESM7_ESM.pdf]
