# Supplementary material for: Alteration in gut microbiota associated with hepatitis B and non-hepatitis virus related hepatocellular carcinoma
Source: PubMed Central journal article supplement (PMC6337822; doi:10.1186/s13099-018-0281-6), 2019-01-18
Supplement: 13099_2018_281_MOESM11_ESM.pdf [file 13099_2018_281_MOESM11_ESM.pdf]

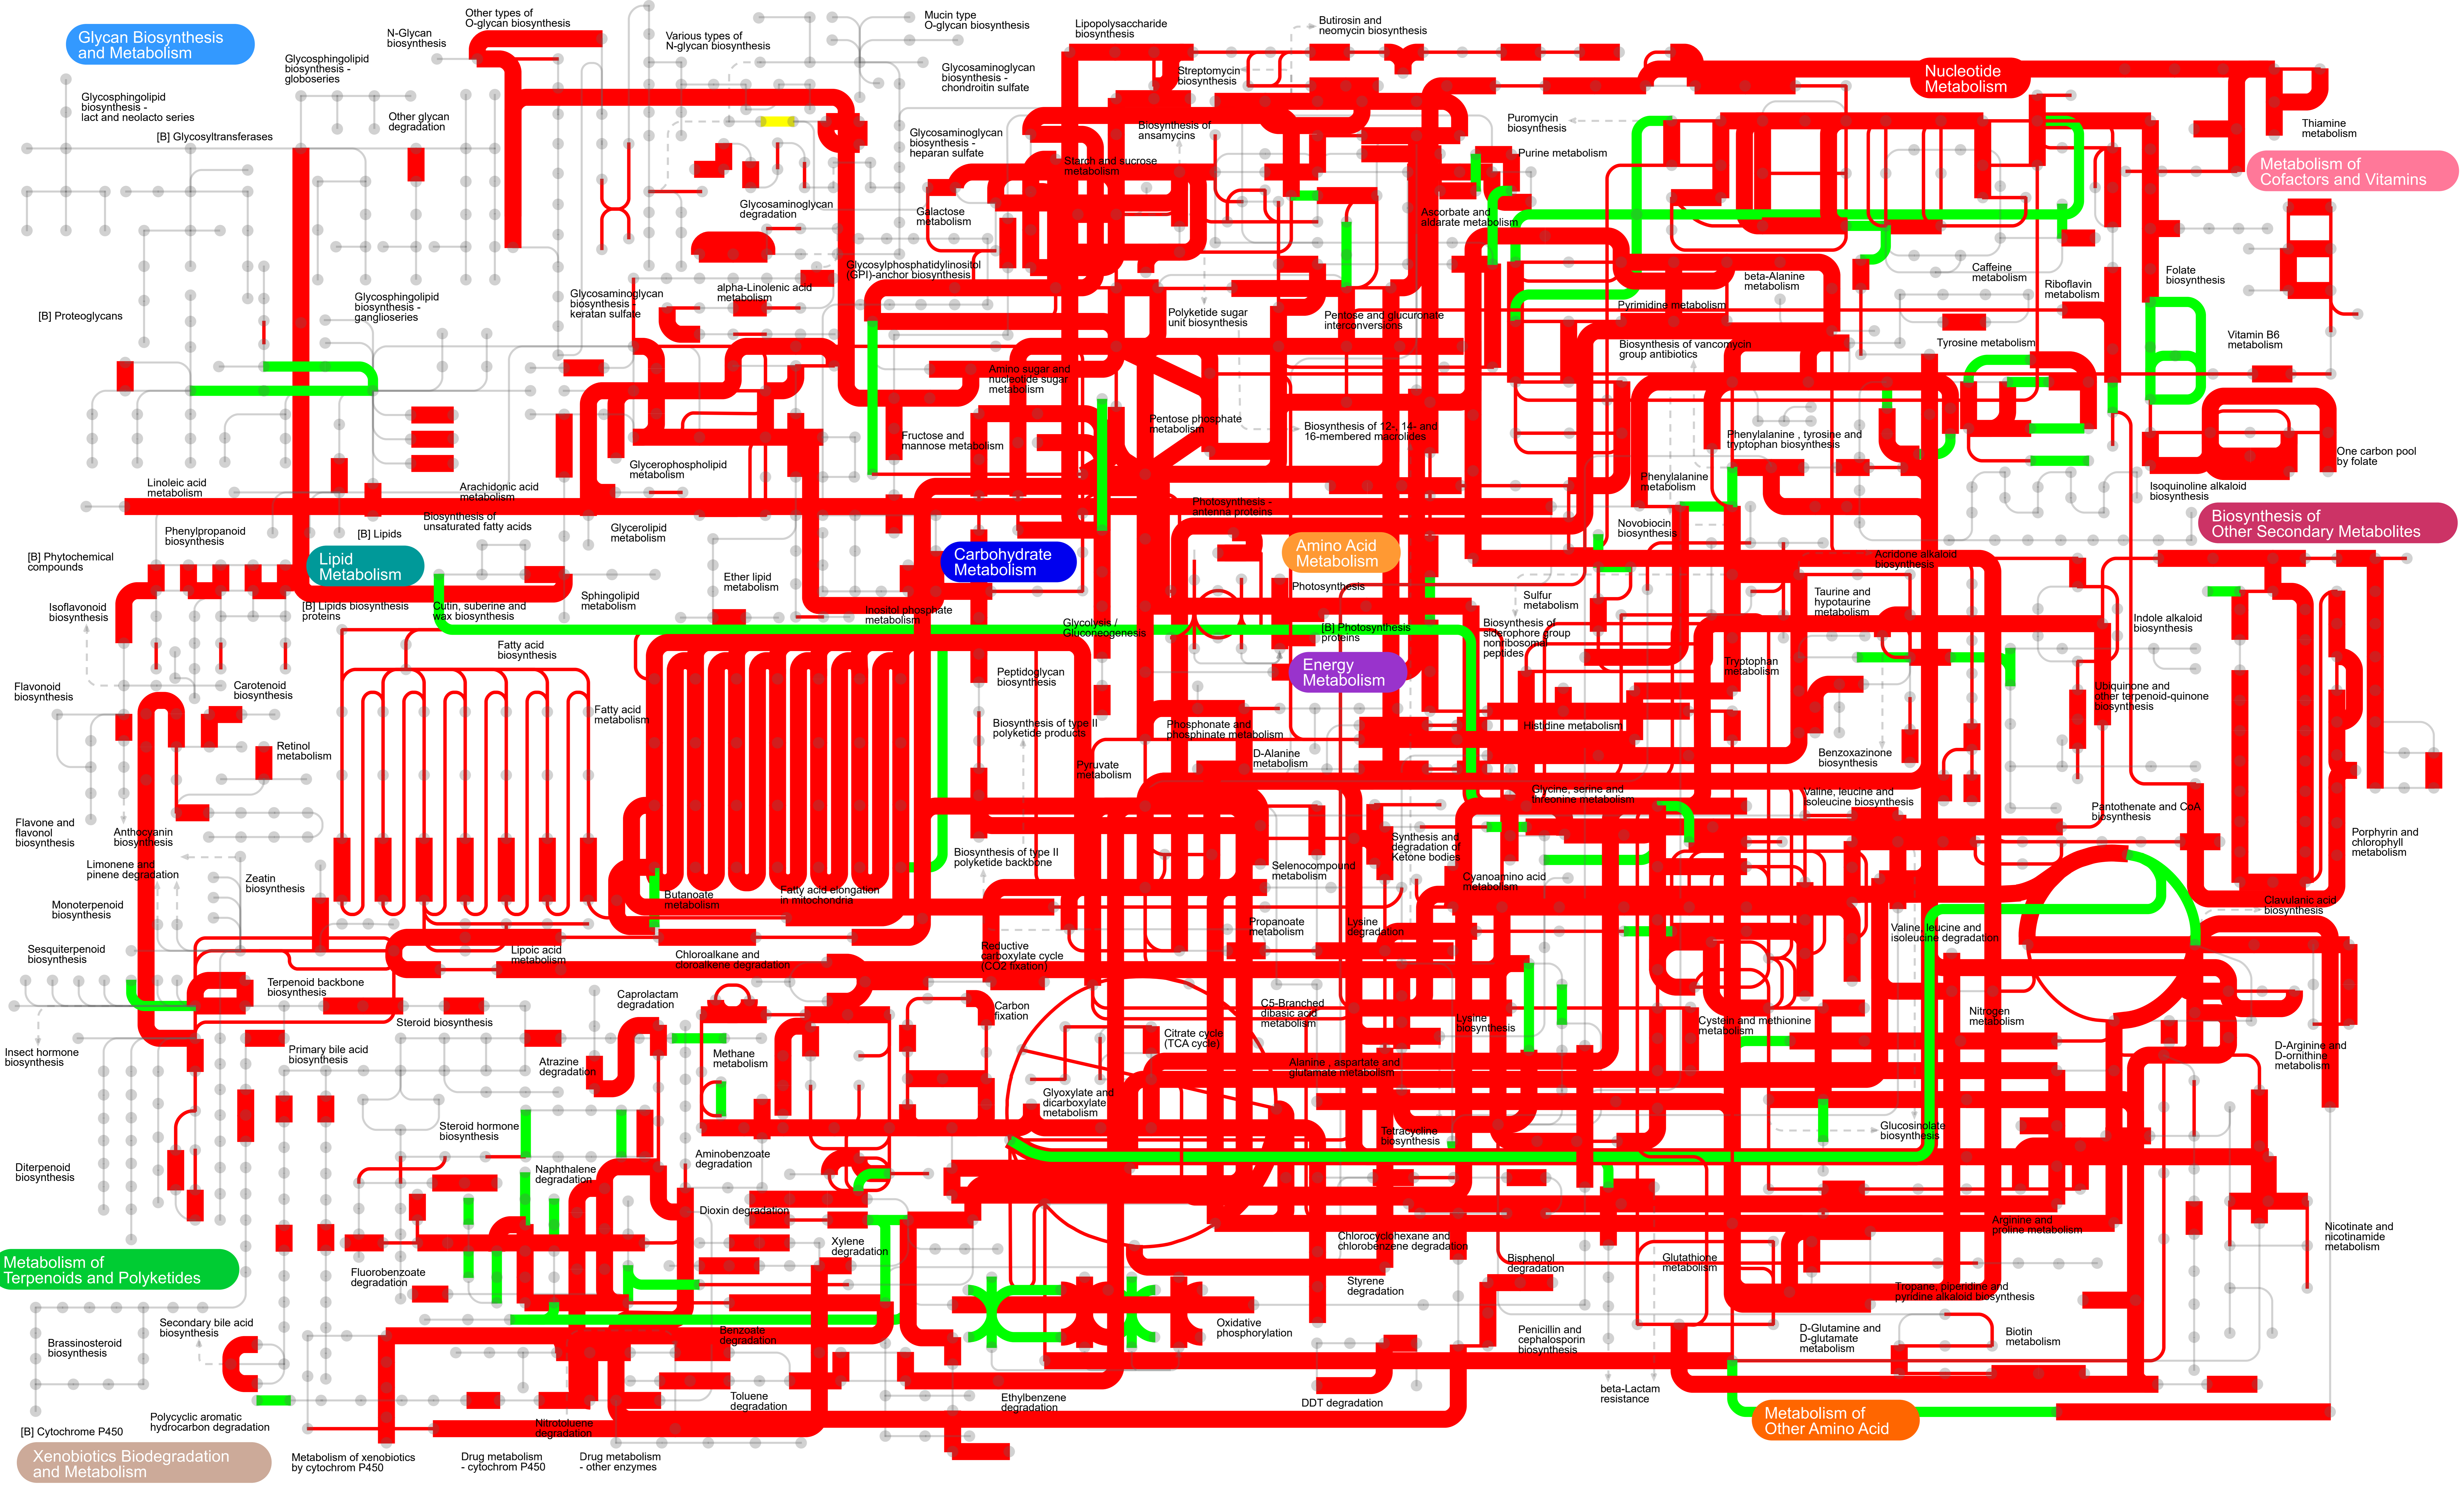

Glycan Biosynthesis and Metabolism

Lipid Metabolism

Carbohydrate Metabolism

Amino Acid Metabolism

Energy Metabolism

Nucleotide Metabolism

Metabolism of Cofactors and Vitamins

Biosynthesis of Other Secondary Metabolites

Metabolism of Terpenoids and Polyketides

Metabolism of Other Amino Acid

Xenobiotics Biodegradation and Metabolism

Metabolism of xenobiotics by cytochrome P450

Drug metabolism - cytochrome P450

Drug metabolism - other enzymes
