# Supplementary material for: Alteration in gut microbiota associated with hepatitis B and non-hepatitis virus related hepatocellular carcinoma
Source: PubMed Central journal article supplement (PMC6337822; doi:10.1186/s13099-018-0281-6), 2019-01-18

Glycan Biosynthesis and Metabolism

Nucleotide Metabolism

Metabolism of Cofactors and Vitamins

Biosynthesis of Other Secondary Metabolites

Lipid Metabolism

Carbohydrate Metabolism

Amino Acid Metabolism

Energy Metabolism

Metabolism of Other Amino Acid

Metabolism of Terpenoids and Polyketides

Xenobiotics Biodegradation and Metabolism

Metabolism of xenobiotics by cytochrom P450

Drug metabolism - cytochrom P450

Drug metabolism - other enzymes

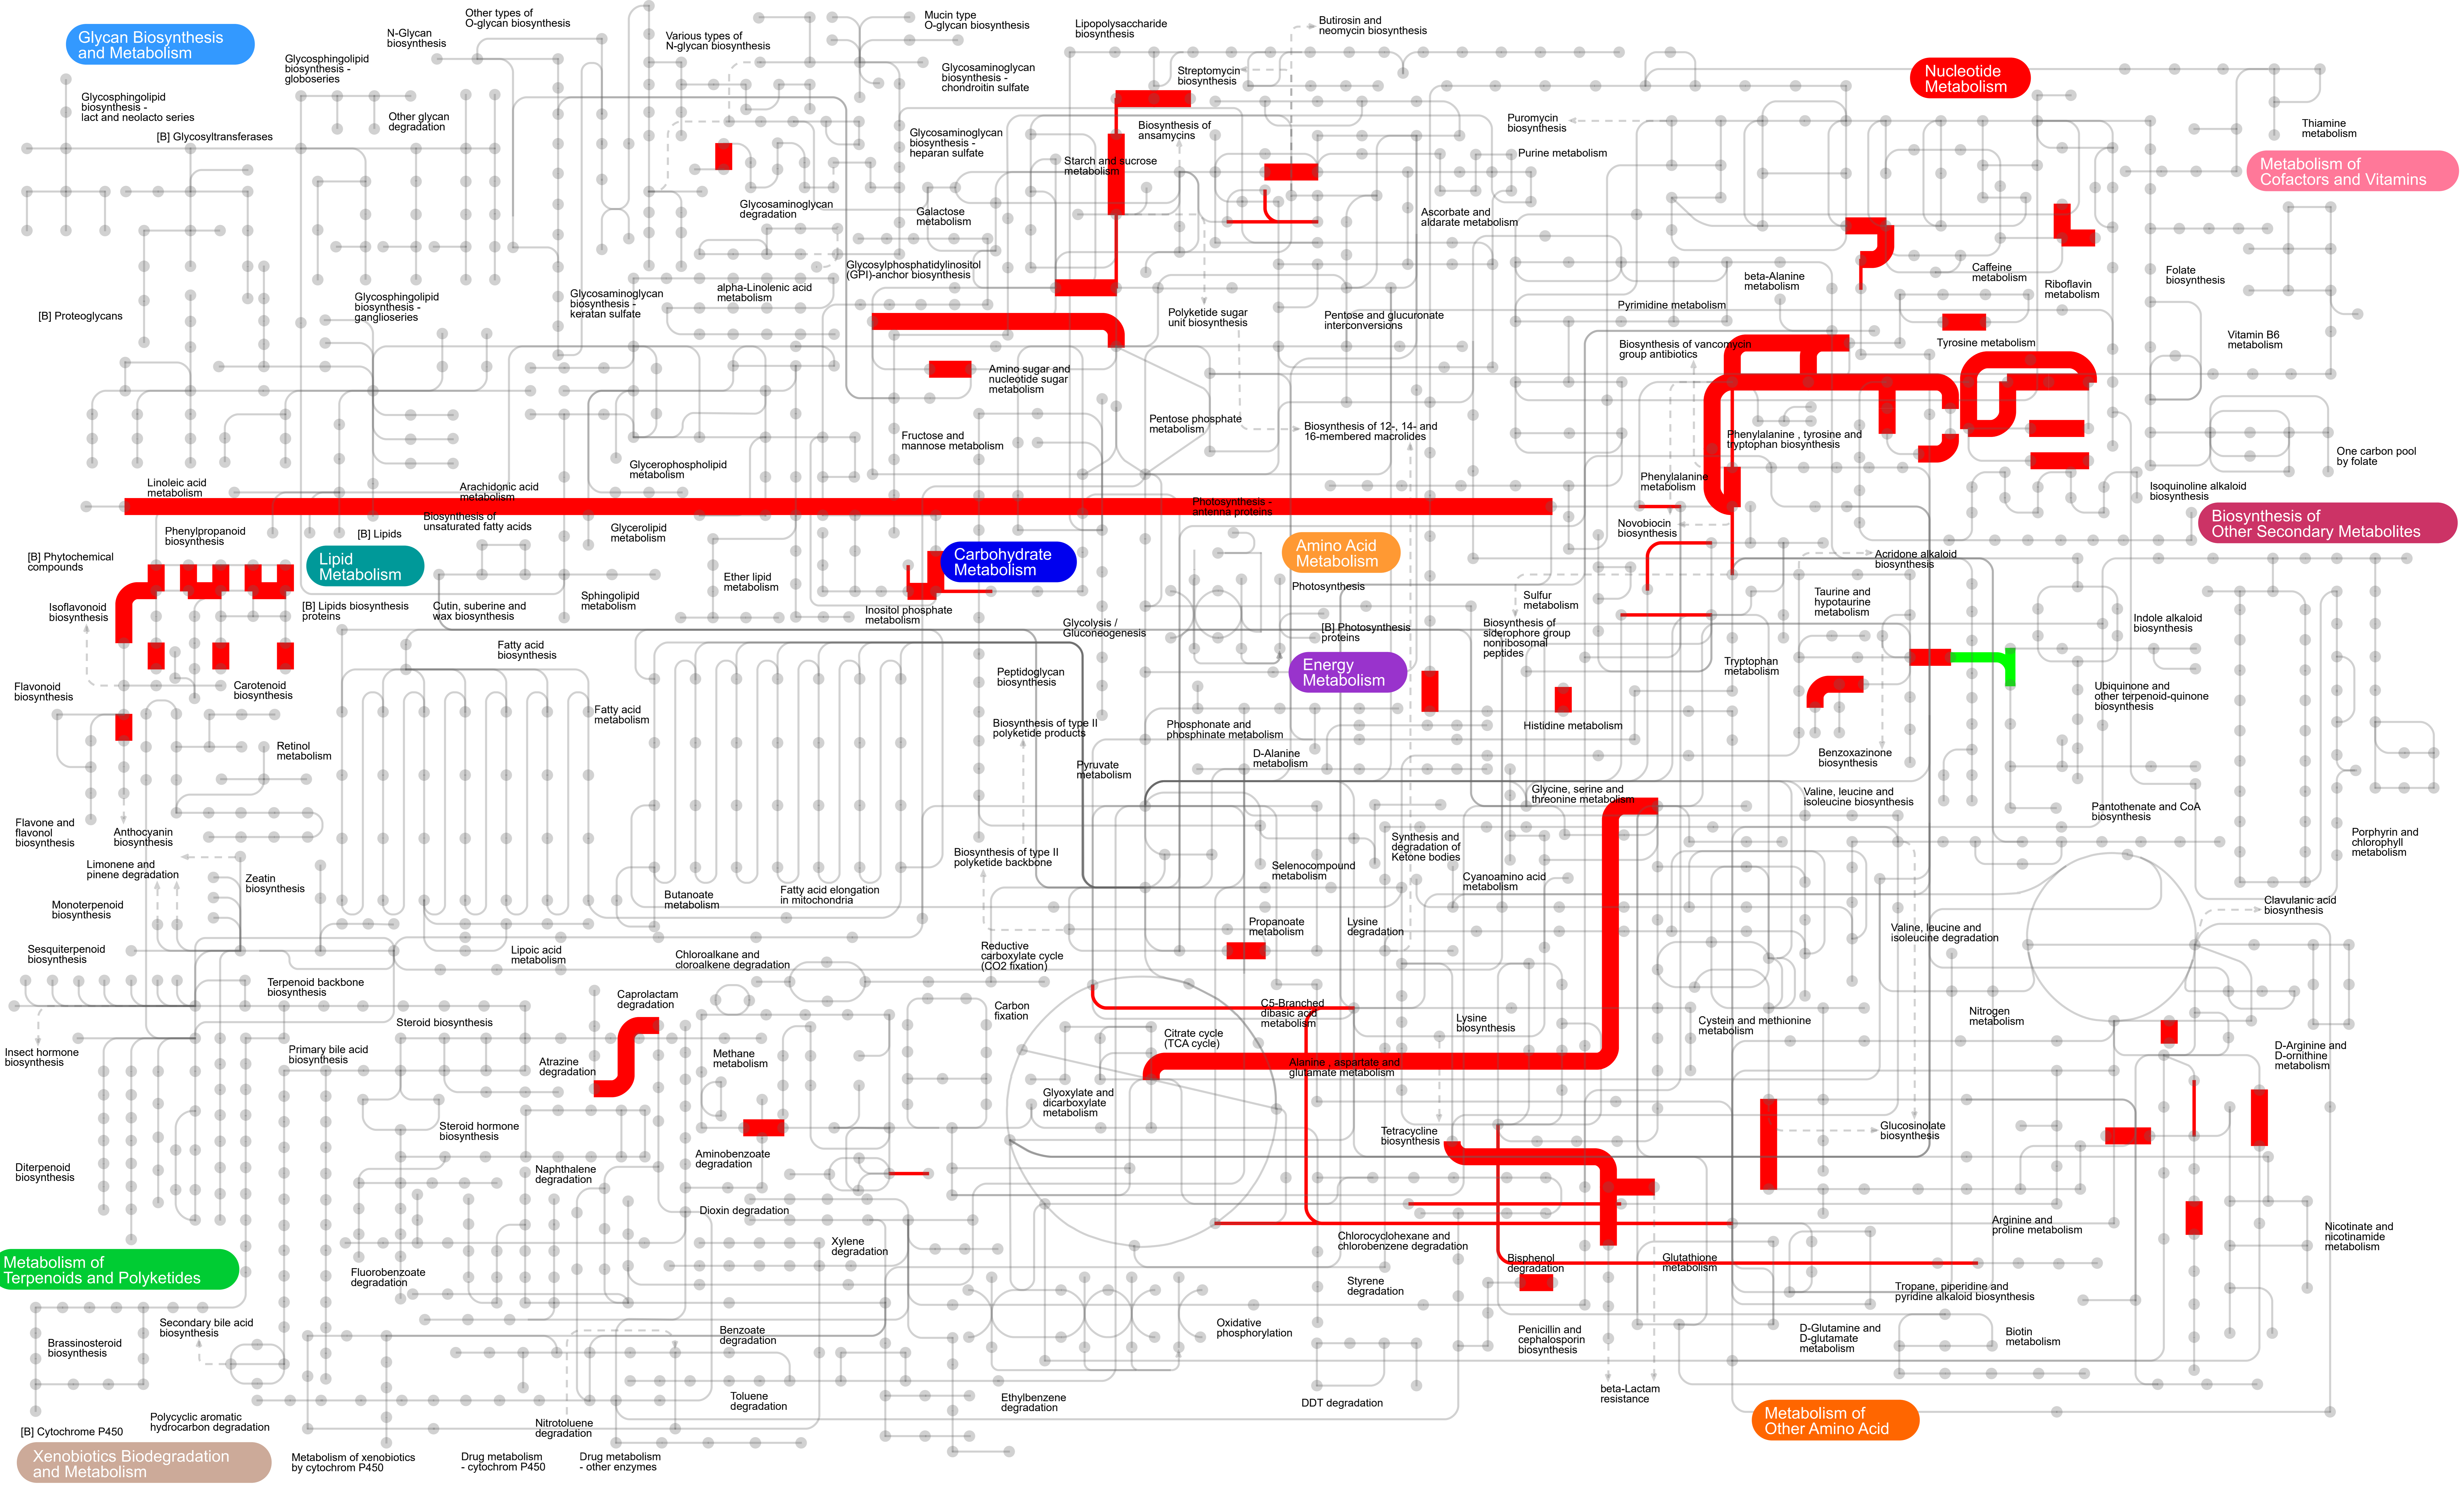

Supplement: 13099_2018_281_MOESM13_ESM.pdf [file 13099_2018_281_MOESM13_ESM.pdf]
