# Supplementary material for: Alteration in gut microbiota associated with hepatitis B and non-hepatitis virus related hepatocellular carcinoma
Source: PubMed Central journal article supplement (PMC6337822; doi:10.1186/s13099-018-0281-6), 2019-01-18

**Glycan Biosynthesis and Metabolism**

**Nucleotide Metabolism**

**Metabolism of Cofactors and Vitamins**

**Biosynthesis of Other Secondary Metabolites**

**Lipid Metabolism**

**Carbohydrate Metabolism**

**Amino Acid Metabolism**

**Energy Metabolism**

**Metabolism of Other Amino Acid**

**Metabolism of Terpenoids and Polyketides**

**Xenobiotics Biodegradation and Metabolism**

Metabolism of xenobiotics by cytochrom P450

Drug metabolism - cytochrom P450

Drug metabolism - other enzymes

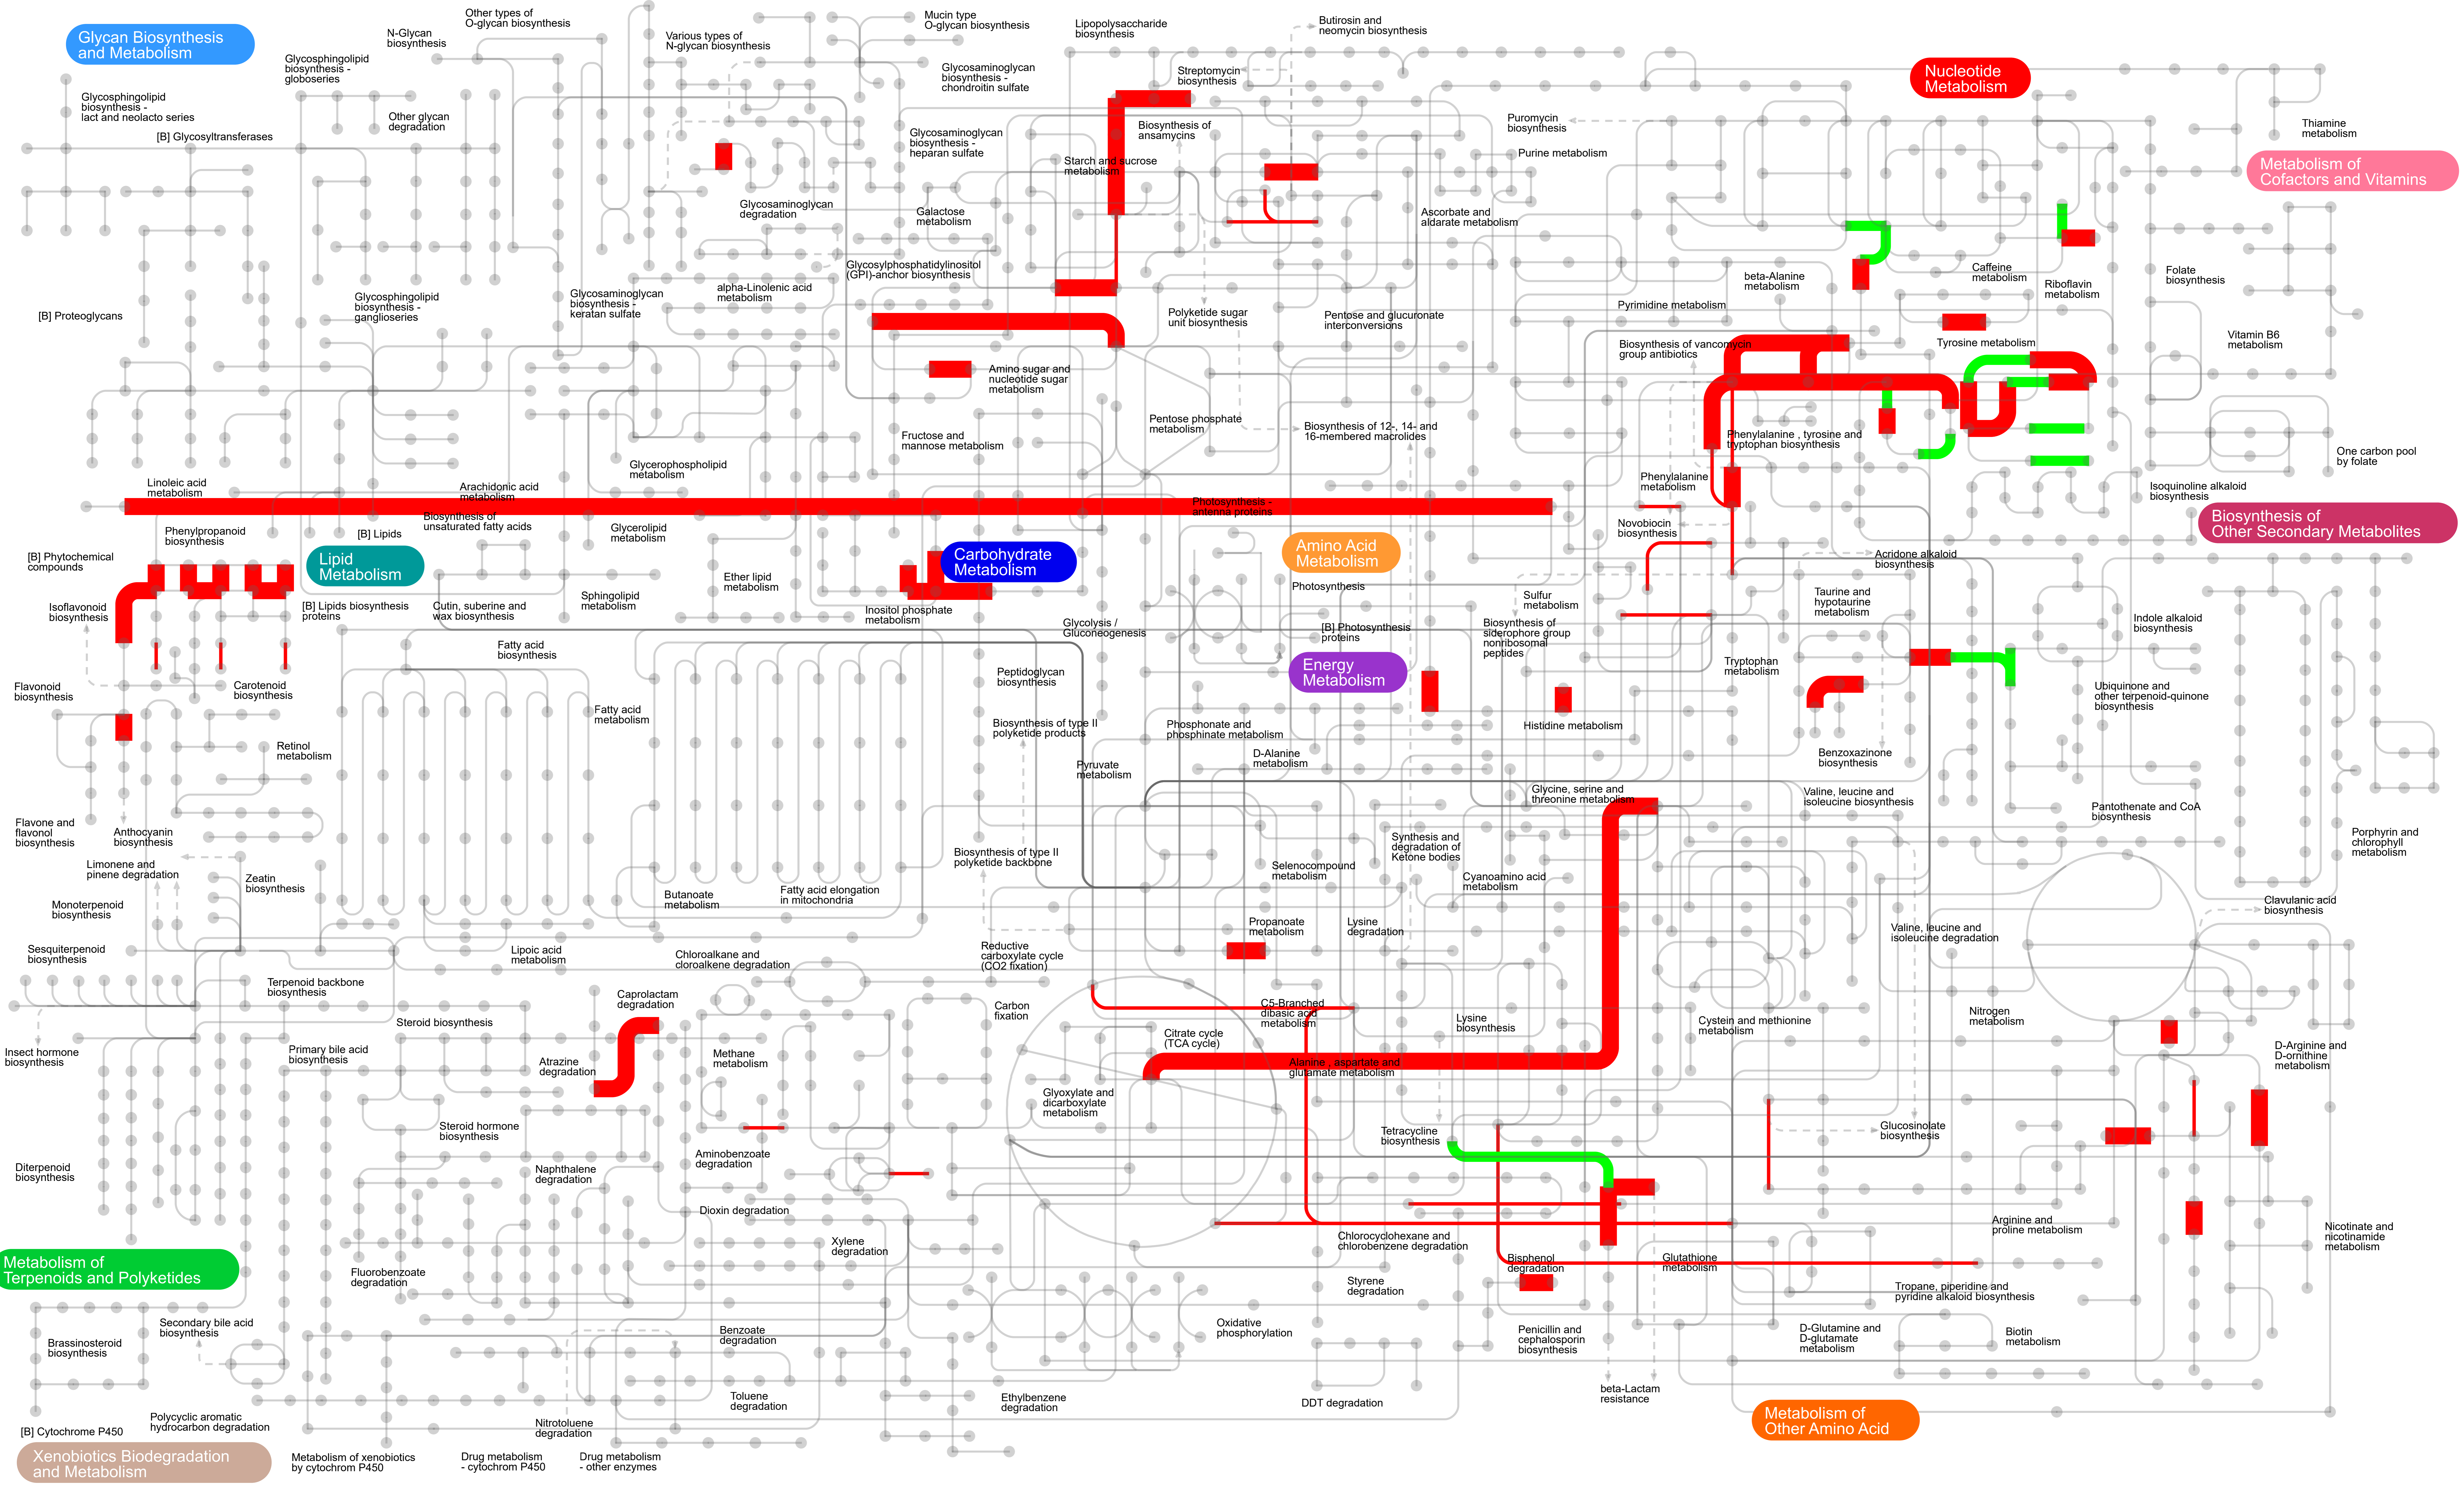

Supplement: 13099_2018_281_MOESM14_ESM.pdf [file 13099_2018_281_MOESM14_ESM.pdf]
