# Supplementary material for: Alteration in gut microbiota associated with hepatitis B and non-hepatitis virus related hepatocellular carcinoma
Source: Springer Nature journal article supplement (doi:10.1186/s13099-018-0281-6), 2019-01-18
Supplement: MOESM15 [file 16406300]

**Glycan Biosynthesis and Metabolism**

**Nucleotide Metabolism**

**Metabolism of Cofactors and Vitamins**

**Biosynthesis of Other Secondary Metabolites**

**Carbohydrate Metabolism**

**Lipid Metabolism**

**Amino Acid Metabolism**

**Energy Metabolism**

**Metabolism of Terpenoids and Polyketides**

**Metabolism of Other Amino Acid**

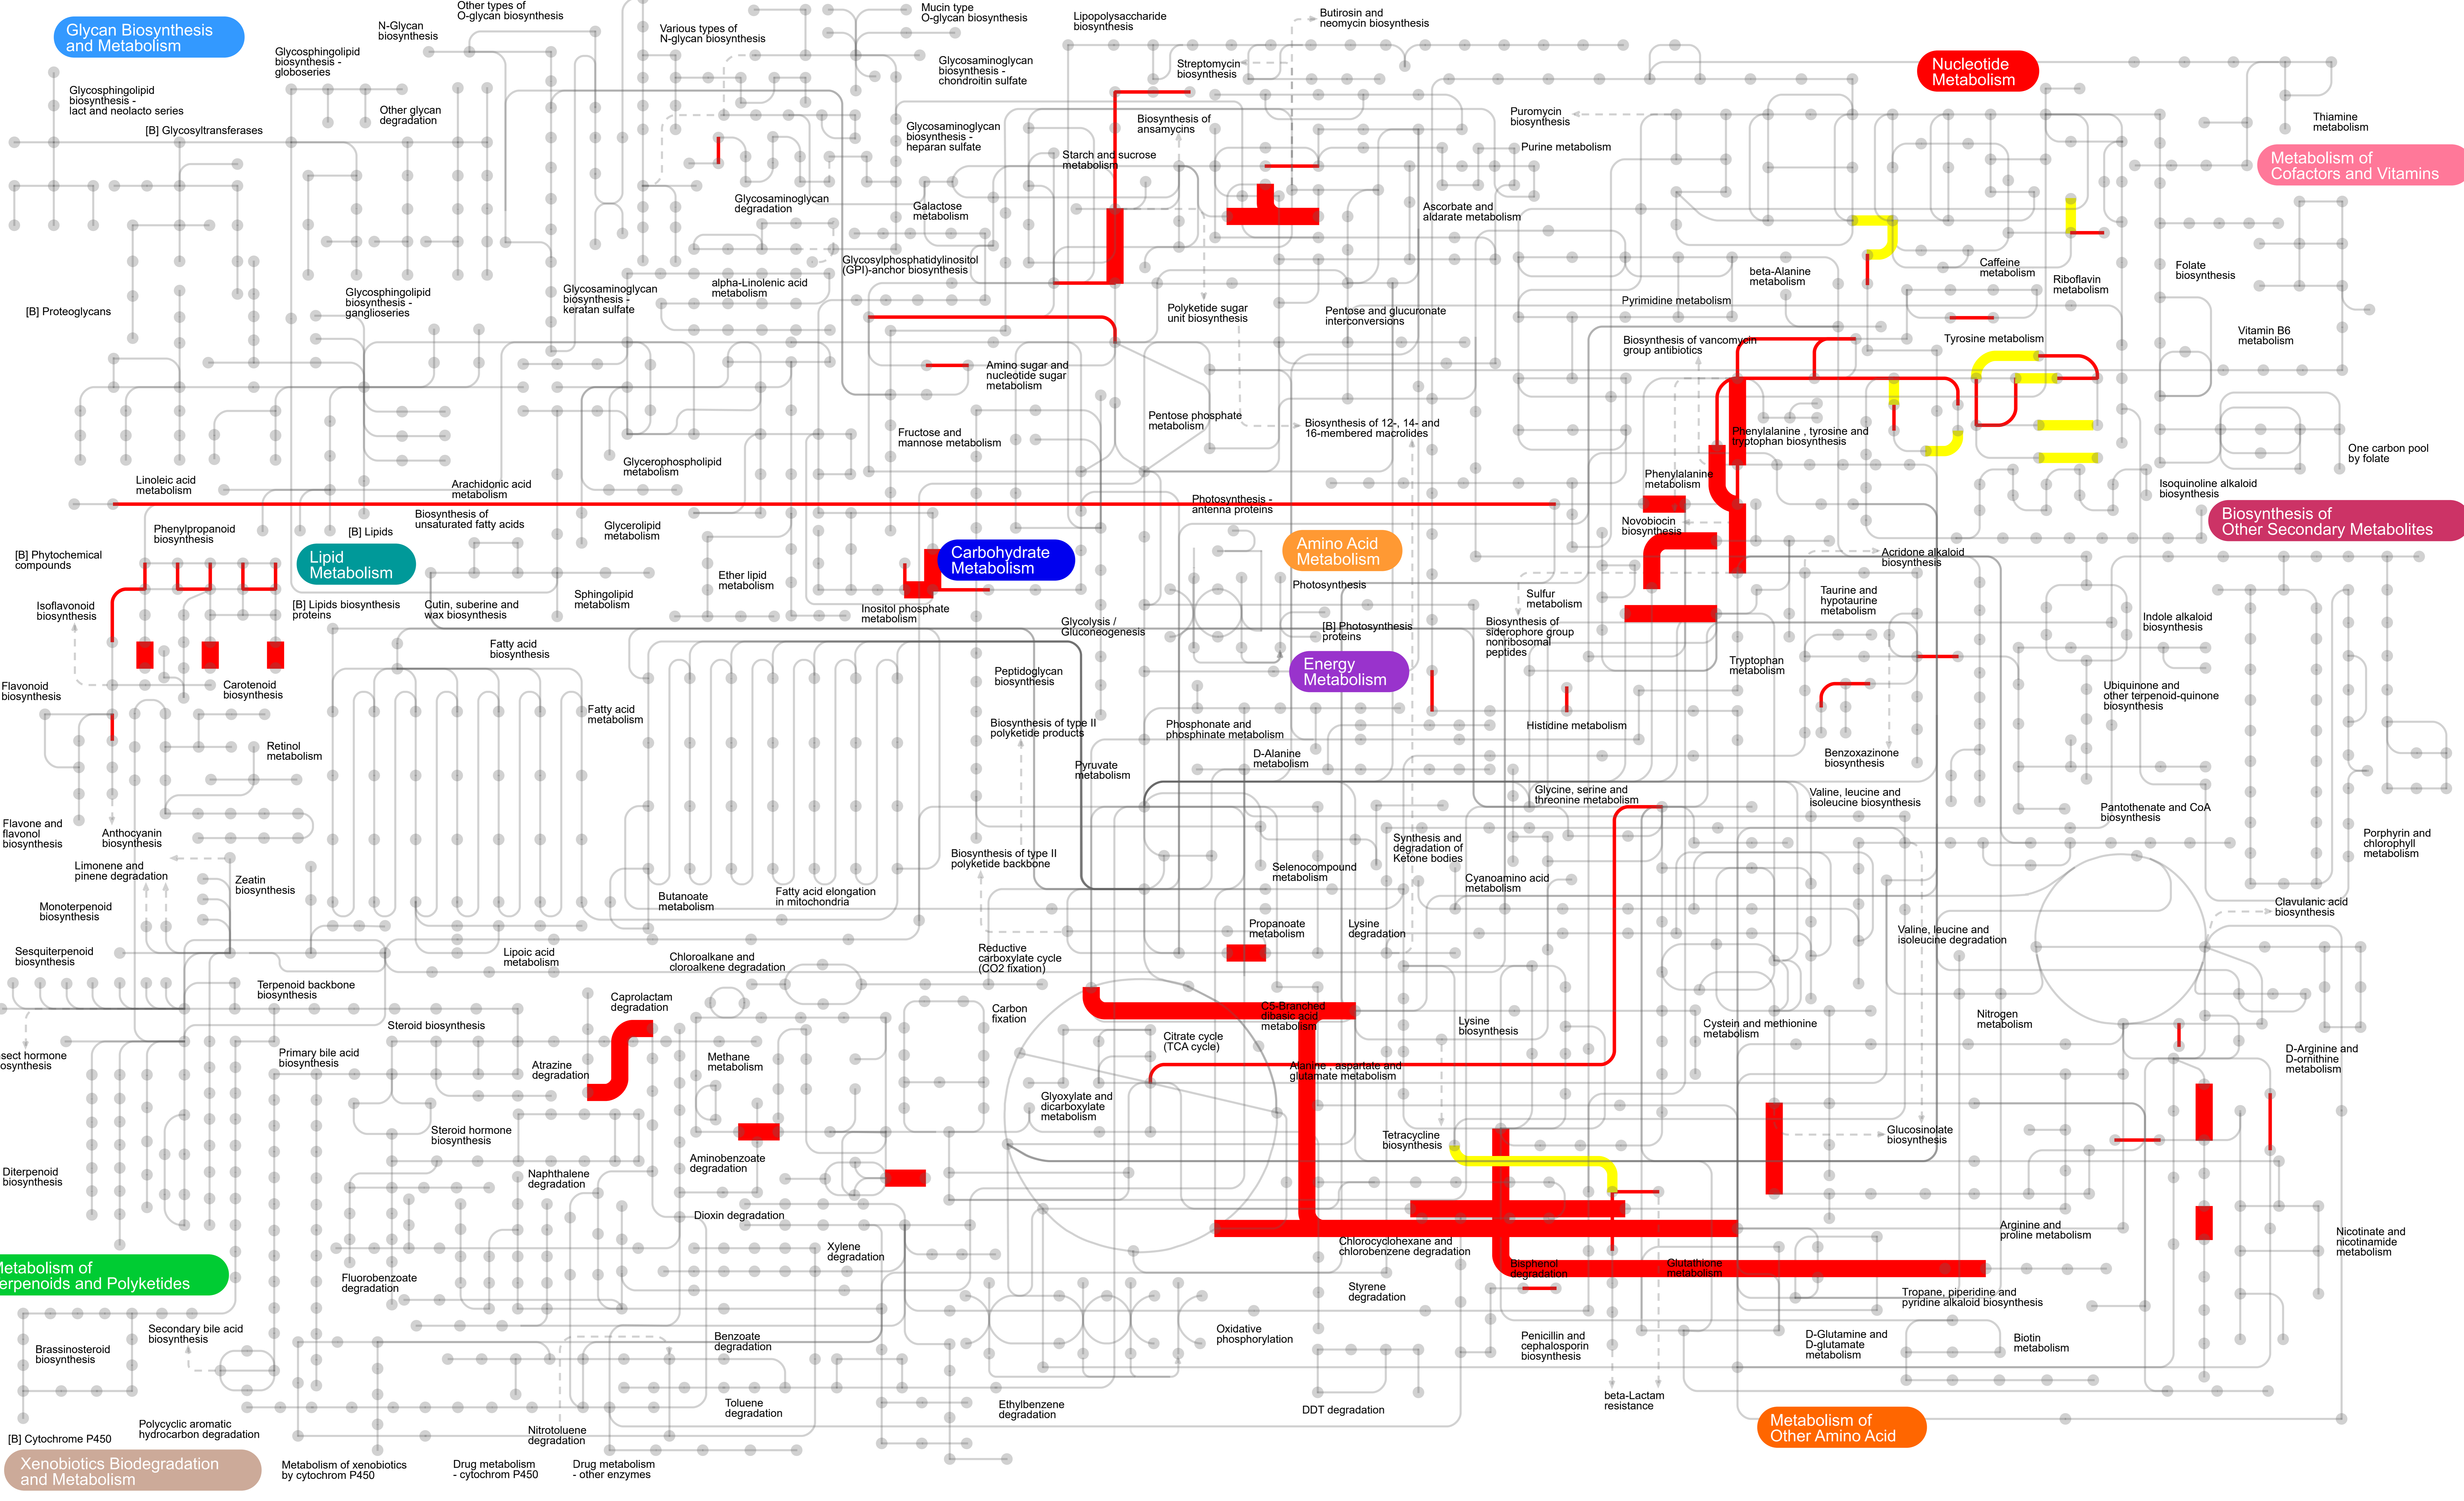

Xenobiotics Biodegradation and Metabolism

Metabolism of xenobiotics by cytochrom P450  
Drug metabolism - cytochrom P450  
Drug metabolism - other enzymes

Nicotinate and nicotinamide metabolism

D-Arginine and D-ornithine metabolism

Porphyrin and chlorophyll metabolism

Indole alkaloid biosynthesis

One carbon pool by folate

Vitamin B6 metabolism

Thiamine metabolism

Folate biosynthesis

Riboflavin metabolism

Caffeine metabolism

Tyrosine metabolism

Biosynthesis of vancomycin group antibiotics

Pyrimidine metabolism

Purine metabolism

Ascorbate and aldarate metabolism

Streptomycin biosynthesis

Biosynthesis of ansamycins

Butirosin and neomycin biosynthesis

Lipopolysaccharide biosynthesis

Mucin type O-glycan biosynthesis

Glycosaminoglycan biosynthesis - chondroitin sulfate

Glycosaminoglycan biosynthesis - heparan sulfate

Galactose metabolism

Starch and sucrose metabolism

Polyketide sugar unit biosynthesis

Pentose and glucuronate interconversions

Pentose phosphate metabolism

Biosynthesis of 12-, 14- and 16-membered macrolides

Fructose and mannose metabolism

Amino sugar and nucleotide sugar metabolism

Glycosylphosphatidylinositol (GPI)-anchor biosynthesis

alpha-Linolenic acid metabolism

Glycerophospholipid metabolism

Glycosaminoglycan biosynthesis - keratan sulfate

Glycosaminoglycan biosynthesis - ganglioseries

Other glycan degradation

N-Glycan biosynthesis

Other types of O-glycan biosynthesis

Glycosphingolipid biosynthesis - globoseries

Glycosphingolipid biosynthesis - lact and neolacto series

[B] Glycosyltransferases

[B] Proteoglycans

Linoleic acid metabolism

Arachidonic acid metabolism

Biosynthesis of unsaturated fatty acids

Glycerolipid metabolism

Ether lipid metabolism

Sphingolipid metabolism

Cutin, suberine and wax biosynthesis

Inositol phosphate metabolism

Photosynthesis - antenna proteins

Photosynthesis

[B] Photosynthesis proteins

Sulfur metabolism

Biosynthesis of siderophore group nonribosomal peptides

Histidine metabolism

Phenylalanine metabolism

Novobiocin biosynthesis

Phenylalanine, tyrosine and tryptophan biosynthesis

Tryptophan metabolism

Acridone alkaloid biosynthesis

Taurine and hypotaurine metabolism

Valine, leucine and isoleucine biosynthesis

Indole alkaloid biosynthesis

Ubiquinone and other terpenoid-quinone biosynthesis

Pantothenate and CoA biosynthesis

Valine, leucine and isoleucine degradation

Nitrogen metabolism

Clavulanic acid biosynthesis

Cysteine and methionine metabolism

Lysine degradation

Lysine biosynthesis

Citrate cycle (TCA cycle)

Glyoxylate and dicarboxylate metabolism

Carbon fixation

Reductive carboxylate cycle (CO2 fixation)

Selenocompound metabolism

Synthesis and degradation of Ketone bodies

Cyanoamino acid metabolism

D-Alanine metabolism

Phosphonate and phosphinate metabolism

Pyruvate metabolism

Biosynthesis of type II polyketide backbone

Biosynthesis of type II polyketide products

Peptidoglycan biosynthesis

Glycolysis / Gluconeogenesis

Fatty acid metabolism

Fatty acid elongation in mitochondria

Butanoate metabolism

Fatty acid biosynthesis

Chloroalkane and chloroalkene degradation

Caprolactam degradation

Methane metabolism

Aminobenzoate degradation

Dioxin degradation

Xylene degradation

Naphthalene degradation

Fluorobenzoate degradation

Benzoate degradation

Toluene degradation

Ethylbenzene degradation

DDT degradation

Oxidative phosphorylation

Styrene degradation

Chlorocyclohexane and chlorobenzene degradation

Bisphenol degradation

Glutathione metabolism

Penicillin and cephalosporin biosynthesis

beta-Lactam resistance

Tropane, piperidine and pyridine alkaloid biosynthesis

D-Glutamine and D-glutamate metabolism

Biotin metabolism

Arginine and proline metabolism

Glucosinolate biosynthesis

Nitrogen metabolism

Cysteine and methionine metabolism

Lysine degradation

Lysine biosynthesis

Propanoate metabolism

Selenocompound metabolism

Synthesis and degradation of Ketone bodies

Cyanoamino acid metabolism

D-Alanine metabolism

Phosphonate and phosphinate metabolism

Pyruvate metabolism

Biosynthesis of type II polyketide backbone

Biosynthesis of type II polyketide products

Peptidoglycan biosynthesis

Glycolysis / Gluconeogenesis

Fatty acid metabolism

Fatty acid elongation in mitochondria

Butanoate metabolism

Fatty acid biosynthesis

Chloroalkane and chloroalkene degradation

Caprolactam degradation

Methane metabolism

Aminobenzoate degradation

Dioxin degradation

Xylene degradation

Naphthalene degradation

Fluorobenzoate degradation

Benzoate degradation

Toluene degradation

Ethylbenzene degradation

DDT degradation

Oxidative phosphorylation

Styrene degradation

Chlorocyclohexane and chlorobenzene degradation

Bisphenol degradation

Glutathione metabolism

Penicillin and cephalosporin biosynthesis

beta-Lactam resistance

Tropane, piperidine and pyridine alkaloid biosynthesis

D-Glutamine and D-glutamate metabolism

Biotin metabolism

Arginine and proline metabolism

Glucosinolate biosynthesis

Nitrogen metabolism

Cysteine and methionine metabolism

Lysine degradation

Lysine biosynthesis

Propanoate metabolism

Selenocompound metabolism

Synthesis and degradation of Ketone bodies

Cyanoamino acid metabolism

D-Alanine metabolism

Phosphonate and phosphinate metabolism

Pyruvate metabolism

Biosynthesis of type II polyketide backbone

Biosynthesis of type II polyketide products

Peptidoglycan biosynthesis

Glycolysis / Gluconeogenesis

Fatty acid metabolism

Fatty acid elongation in mitochondria

Butanoate metabolism

Fatty acid biosynthesis

Chloroalkane and chloroalkene degradation

Caprolactam degradation

Methane metabolism

Aminobenzoate degradation

Dioxin degradation

Xylene degradation

Naphthalene degradation

Fluorobenzoate degradation

Benzoate degradation

Toluene degradation

Ethylbenzene degradation

DDT degradation

Oxidative phosphorylation

Styrene degradation

Chlorocyclohexane and chlorobenzene degradation

Bisphenol degradation

Glutathione metabolism

Penicillin and cephalosporin biosynthesis

beta-Lactam resistance

Tropane, piperidine and pyridine alkaloid biosynthesis

D-Glutamine and D-glutamate metabolism

Biotin metabolism

Arginine and proline metabolism

Glucosinolate biosynthesis

Nitrogen metabolism

Cysteine and methionine metabolism

Lysine degradation

Lysine biosynthesis

Propanoate metabolism

Selenocompound metabolism

Synthesis and degradation of Ketone bodies

Cyanoamino acid metabolism

D-Alanine metabolism

Phosphonate and phosphinate metabolism

Pyruvate metabolism

Biosynthesis of type II polyketide backbone

Biosynthesis of type II polyketide products

Peptidoglycan biosynthesis

Glycolysis / Gluconeogenesis

Fatty acid metabolism

Fatty acid elongation in mitochondria

Butanoate metabolism

Fatty acid biosynthesis

Chloroalkane and chloroalkene degradation

Caprolactam degradation

Methane metabolism

Aminobenzoate degradation

Dioxin degradation

Xylene degradation

Naphthalene degradation

Fluorobenzoate degradation

Benzoate degradation

Toluene degradation

Ethylbenzene degradation

DDT degradation

Oxidative phosphorylation

Styrene degradation

Chlorocyclohexane and chlorobenzene degradation

Bisphenol degradation

Glutathione metabolism

Penicillin and cephalosporin biosynthesis

beta-Lactam resistance

Tropane, piperidine and pyridine alkaloid biosynthesis

D-Glutamine and D-glutamate metabolism

Biotin metabolism

Arginine and proline metabolism

Glucosinolate biosynthesis

Nitrogen metabolism

Cysteine and methionine metabolism

Lysine degradation

Lysine biosynthesis

Propanoate metabolism

Selenocompound metabolism

Synthesis and degradation of Ketone bodies

Cyanoamino acid metabolism

D-Alanine metabolism

Phosphonate and phosphinate metabolism

Pyruvate metabolism

Biosynthesis of type II polyketide backbone

Biosynthesis of type II polyketide products

Peptidoglycan biosynthesis

Glycolysis / Gluconeogenesis

Fatty acid metabolism

Fatty acid elongation in mitochondria

Butanoate metabolism

Fatty acid biosynthesis

Chloroalkane and chloroalkene degradation

Caprolactam degradation

Methane metabolism

Aminobenzoate degradation

Dioxin degradation

Xylene degradation

Naphthalene degradation

Fluorobenzoate degradation

Benzoate degradation

Toluene degradation

Ethylbenzene degradation

DDT degradation

Oxidative phosphorylation

Styrene degradation

Chlorocyclohexane and chlorobenzene degradation

Bisphenol degradation

Glutathione metabolism

Penicillin and cephalosporin biosynthesis

beta-Lactam resistance

Tropane, piperidine and pyridine alkaloid biosynthesis

D-Glutamine and D-glutamate metabolism

Biotin metabolism

Arginine and proline metabolism

Glucosinolate biosynthesis

Nitrogen metabolism

Cysteine and methionine metabolism

Lysine degradation

Lysine biosynthesis

Propanoate metabolism

Selenocompound metabolism

Synthesis and degradation of Ketone bodies

Cyanoamino acid metabolism

D-Alanine metabolism

</
