# Supplementary material for: Alteration in gut microbiota associated with hepatitis B and non-hepatitis virus related hepatocellular carcinoma
Source: Gut Pathog. 2019 Jan 18;11:1. doi: 10.1186/s13099-018-0281-6 (PMC6337822; doi:10.1186/s13099-018-0281-6)
Supplement: Supplementary file 10 — Additional file 10. The differences in metabolic pathway between healthy controls and B-HCC patients. Green line is the special metabolism for healthy controls, yellow line is the special metabolism for B-HCC patients, red line for the common metabolism. [file 13099_2018_281_MOESM10_ESM.pdf]

Glycan Biosynthesis and Metabolism

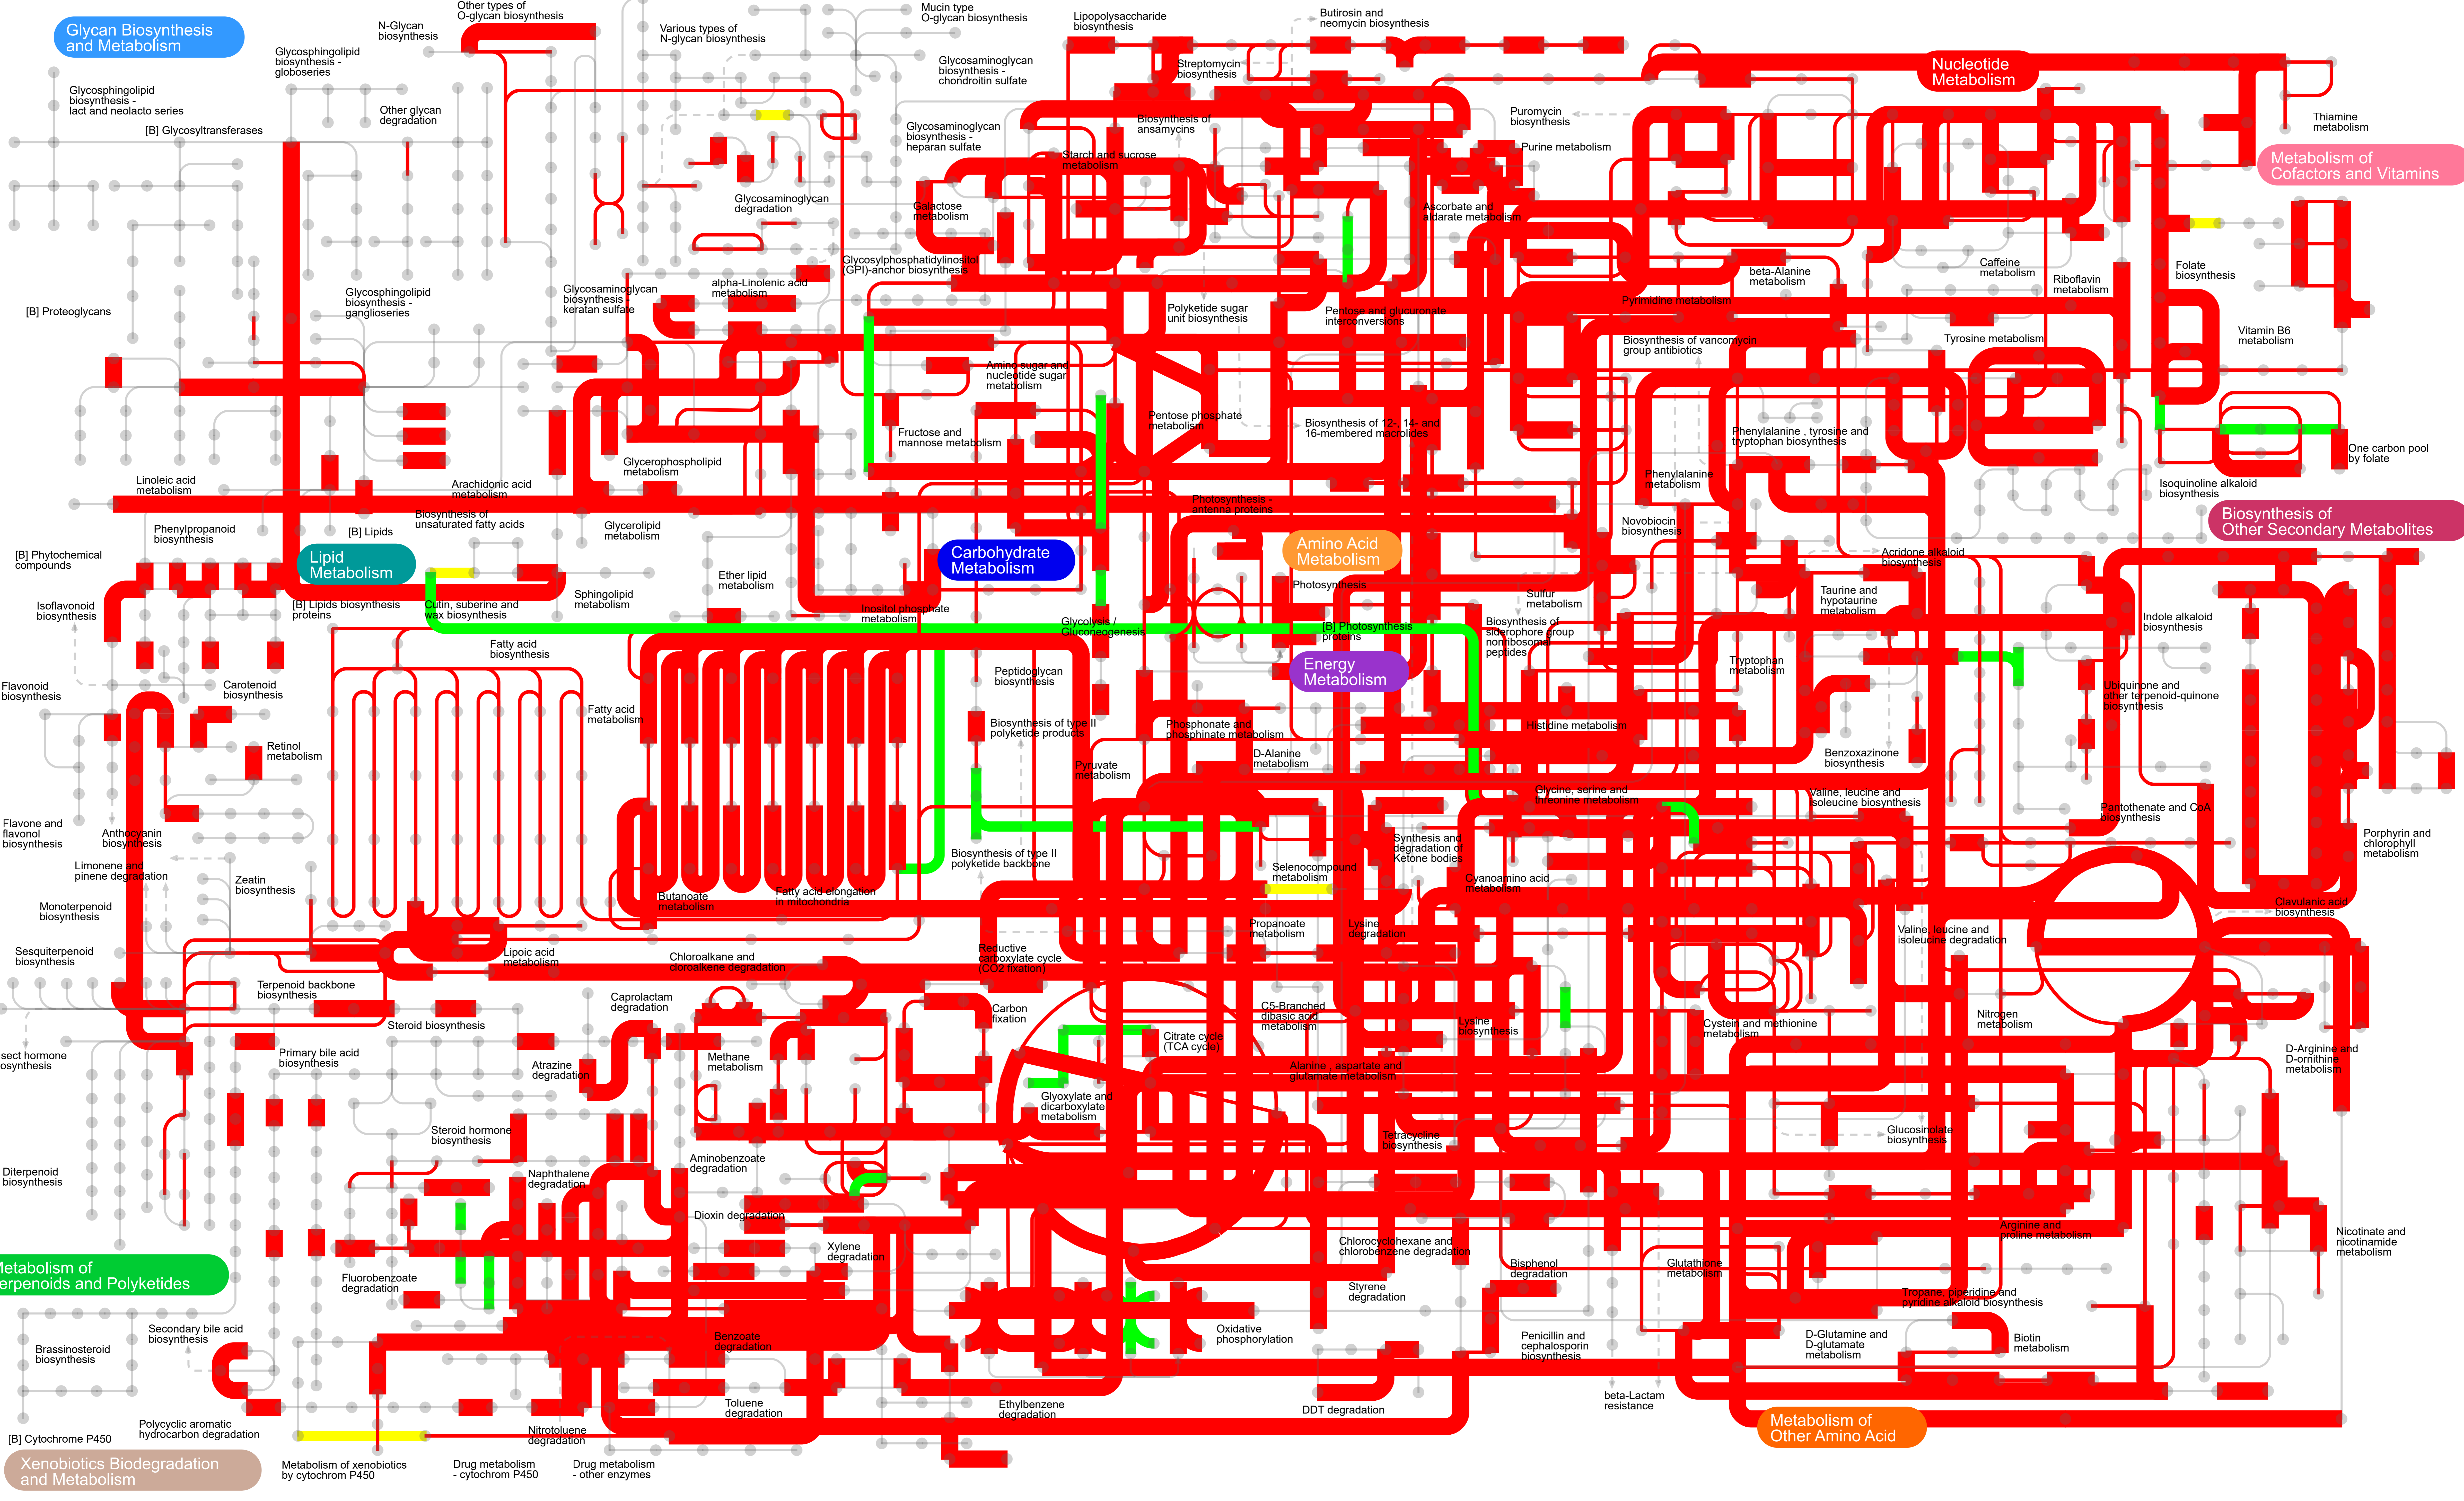

[B] Cytochrome P450

Metabolism of xenobiotics by cytochrome P450

Drug metabolism - cytochrome P450

Drug metabolism - other enzymes

Metabolism of Other Amino Acid
