# Supplementary material for: Alteration in gut microbiota associated with hepatitis B and non-hepatitis virus related hepatocellular carcinoma
Source: Gut Pathog. 2019 Jan 18;11:1. doi: 10.1186/s13099-018-0281-6 (PMC6337822; doi:10.1186/s13099-018-0281-6)

Glycan Biosynthesis and Metabolism

Nucleotide Metabolism

Metabolism of Cofactors and Vitamins

Biosynthesis of Other Secondary Metabolites

Carbohydrate Metabolism

Amino Acid Metabolism

Energy Metabolism

Lipid Metabolism

Metabolism of Terpenoids and Polyketides

Metabolism of Other Amino Acid

Xenobiotics Biodegradation and Metabolism

Metabolism of xenobiotics by cytochrome P450  
Drug metabolism - cytochrome P450  
Drug metabolism - other enzymes

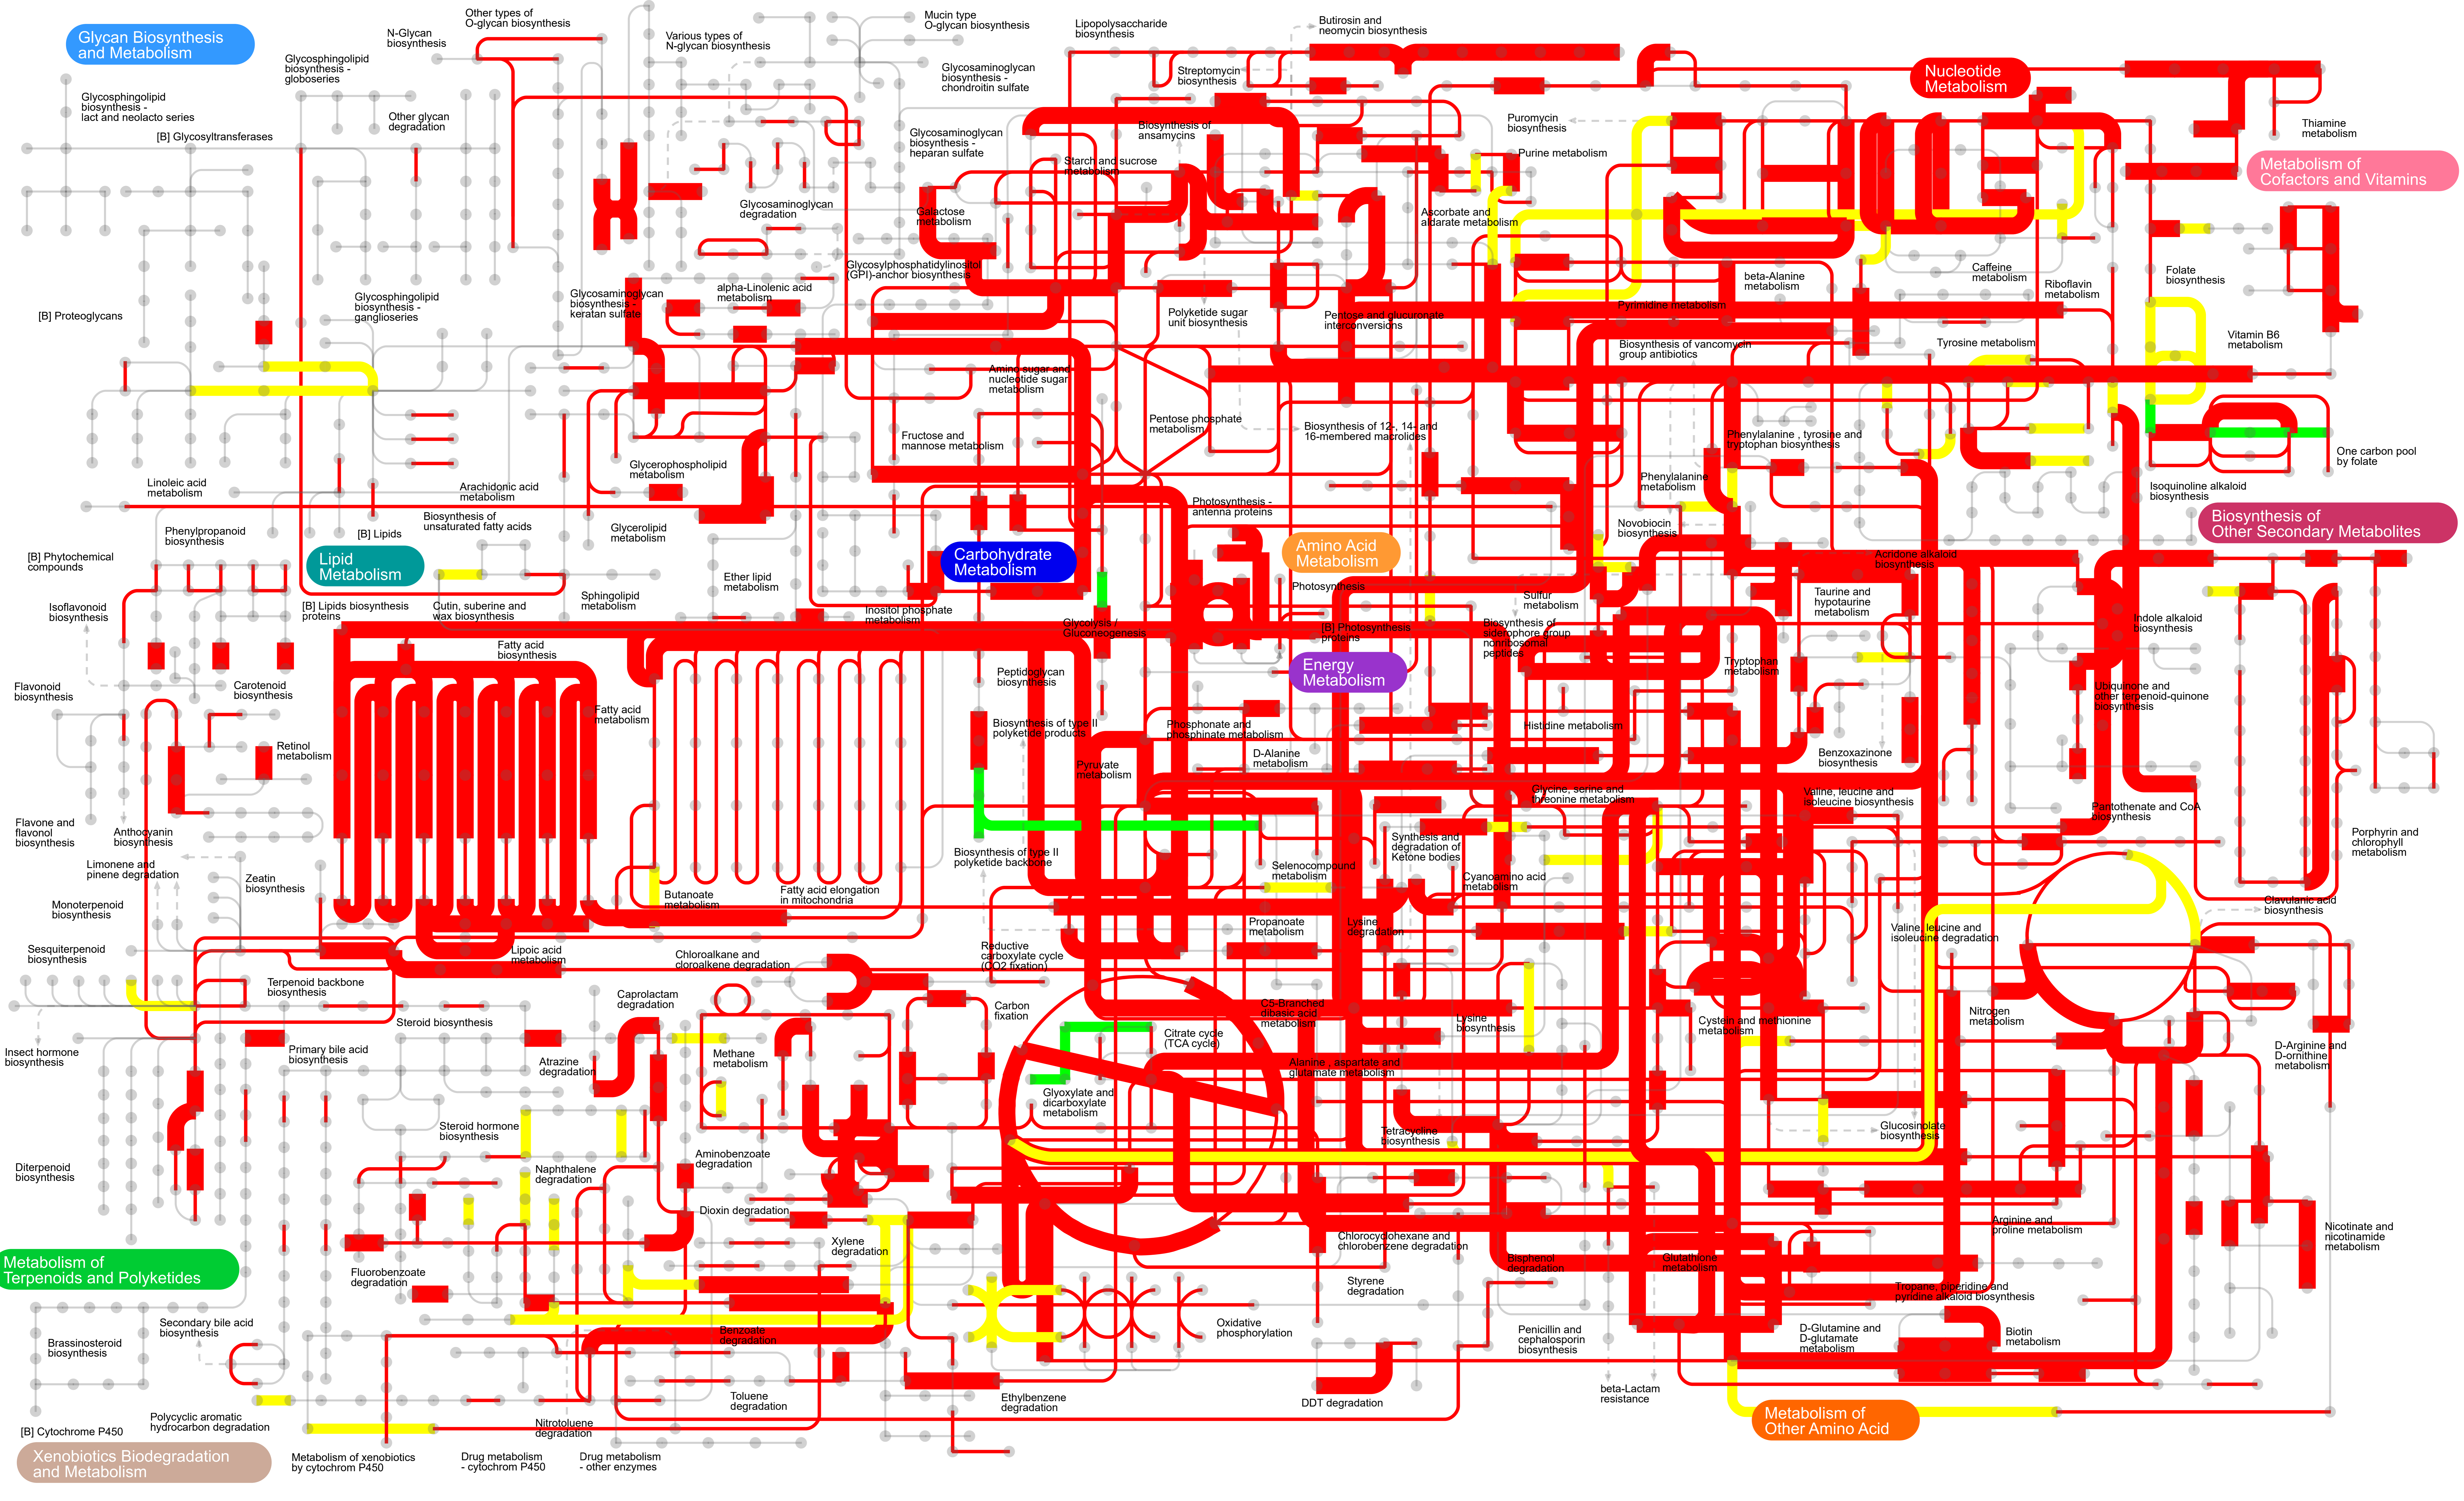

Supplement: Supplementary file 12 — Additional file 12. The differences in metabolic pathway between B-HCC and NBNC-HCC patients. Green line is the special metabolism for B-HCC patients, yellow line is the special metabolism for NBNC-HCC patients, red line for the common metabolism. [file 13099_2018_281_MOESM12_ESM.pdf]
